# Supplementary figures and images for: Prevalence, causes and consequences of compassion satisfaction and compassion fatigue in emergency care: a mixed-methods study of UK NHS Consultants
Source: HighWire-hosted journal article supplement (doi:10.1136/emermed-2014-203671), 2014-09-23

Figure S1: Flow of participants through the study

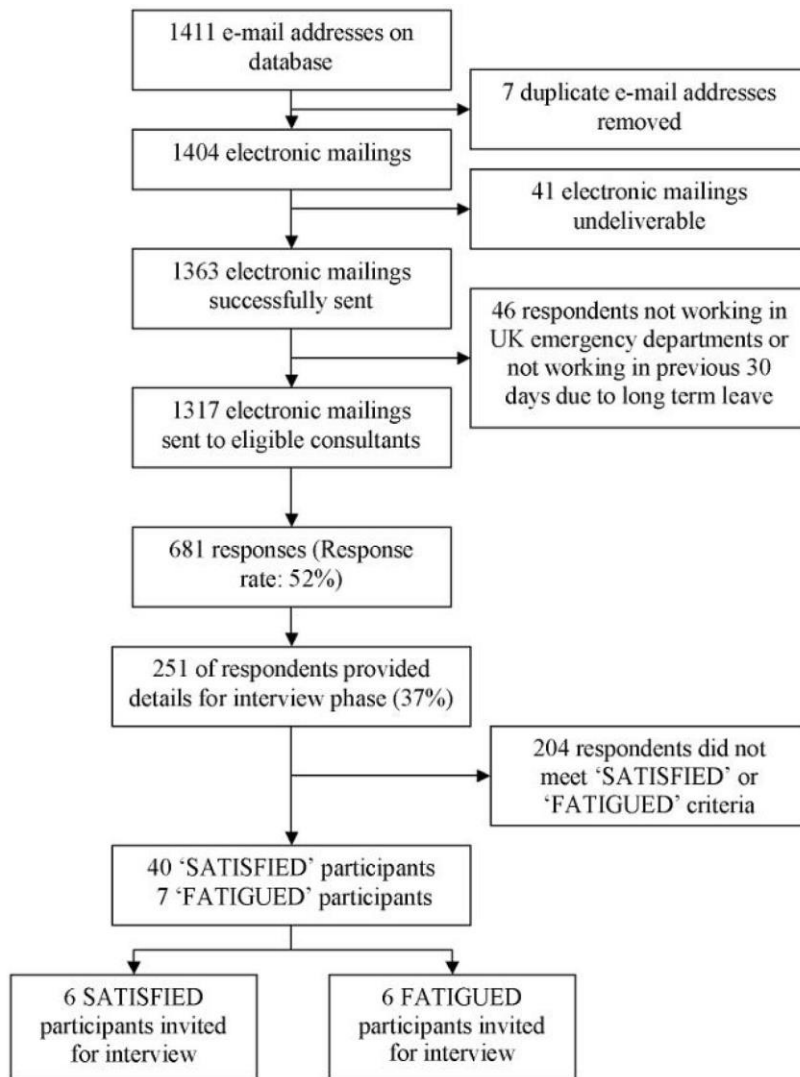

Supplement: emermed-2014-203671supp.pdf [file emermed-2014-203671supp.pdf]
